# Supplementary material for: A contact-polymerizable hemostatic powder for rapid hemostasis
Source: Royal Society of Chemistry journal article supplement (doi:10.1039/d3bm00075c), 2023-01-01
Supplement: d3bm00075c1.pdf [file d3bm00075c1.pdf]

## Supporting Information

# A Contact-Polymerizable Hemostatic Powder for Rapid Hemostasis

*Jia Wang<sup>ab</sup>, Cheng Li<sup>bc</sup>, Wei Zhang<sup>b</sup>, Weimin Huang<sup>b</sup>, Zhiqiang Liu<sup>d</sup>, Rui Shi<sup>e</sup>, Shiyuan Wang<sup>b</sup>, Shan Liu<sup>f</sup>, Weiguo Shi<sup>b</sup>, Yunlan Li<sup>a\*</sup>, Liang Xu<sup>b\*</sup>.*

<sup>a</sup> School of Pharmaceutical Science, Shanxi Medical University, 56 Xinjian South Road, Taiyuan, 030001, China.

<sup>b</sup> State Key Laboratory of Toxicology and Medical Countermeasures, Beijing Institute of Pharmacology and Toxicology, 27 Taiping road, Beijing, 100850, China.

<sup>c</sup> Department of Orthopaedic Surgery, Beijing Jishuitan Hospital, Fourth Clinical College of Peking University, Beijing, China

<sup>d</sup> Beijing Institute of Basic Medical Sciences, 27 Taiping road, Beijing, 100850, China.

<sup>e</sup> Beijing Research Institute of Traumatology and Orthopaedics, Beijing Jishuitan Hospital, Beijing, 100035, China.

<sup>f</sup> Pathology Department of PLA Rocket Force Characteristic Medical Center, Beijing 100085, China

*[\*] Corresponding author*

## Synthesis of the CA-PEG-CA

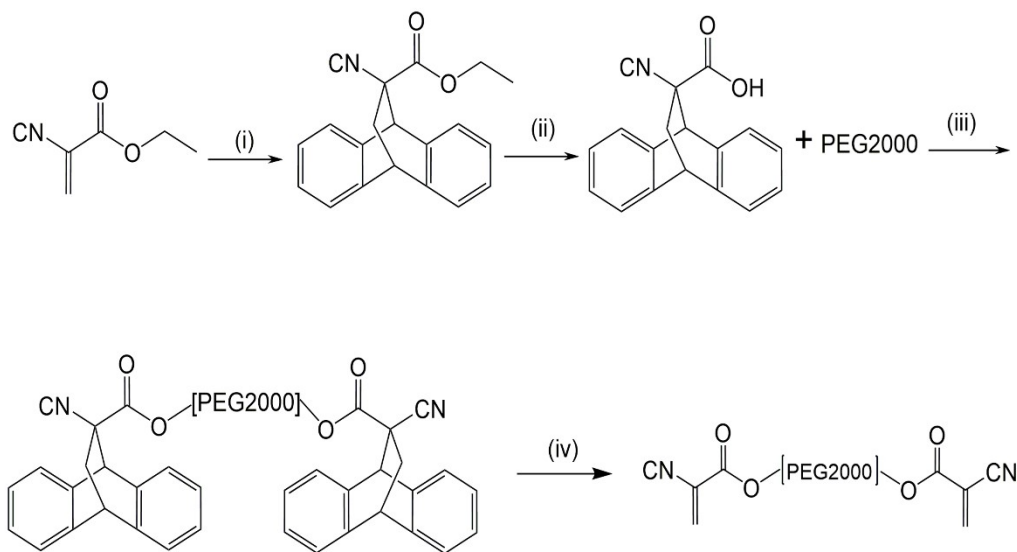

**Scheme S1.** Synthetic route of CA-PEG-CA (i) toluene, rt. (ii) ethanol, KOH, H<sub>2</sub>O, rt, 78.8%. (iii) PEG2000, DMAP, DIC, DCM, dichloromethane, rt, 67.3% (iv) maleic anhydride, dimethylbenzene, rt, 63.9%.

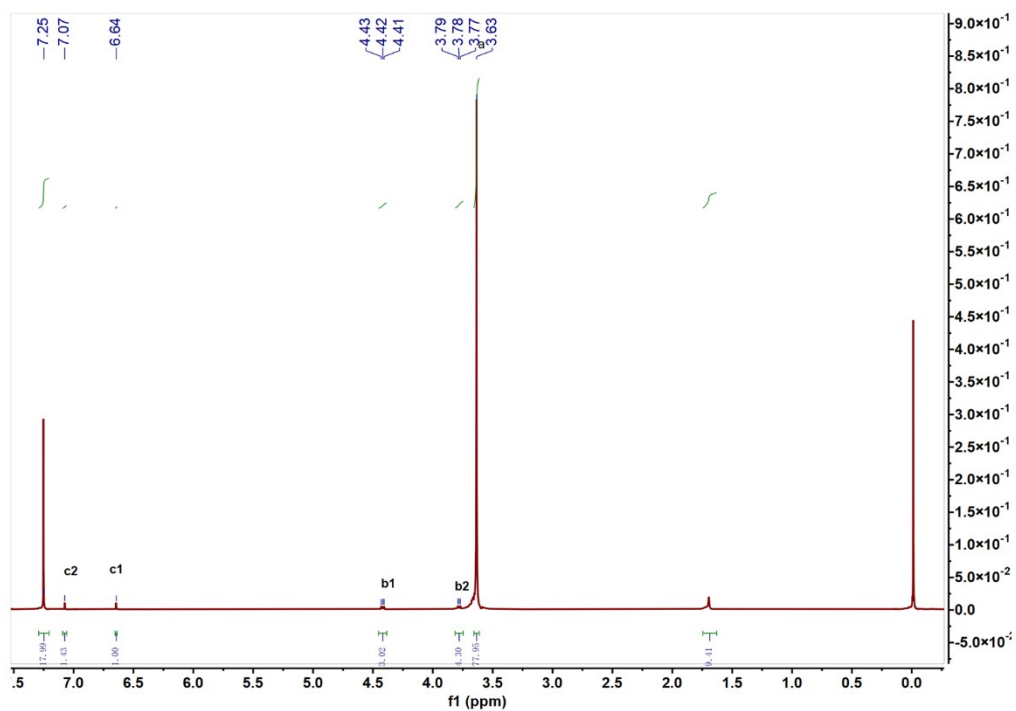

**Fig. S1** <sup>1</sup>H NMR spectra of monomer compound of poly(ethylene glycol)-di(cyanoacrylate) (CA-PEG-CA)

<sup>1</sup>H-NMR (400 MHz, CDCl<sub>3</sub>, 25 °C, TMS): d 7.09 (s, 2H, H 2CQC), 6.66 ppm (s, 2H, H 2CQC), 4.43 ppm (t, 3J(H,H) = 8.3 Hz, 4H; COO CH<sub>2</sub>), 3.68 ppm (m, 232H; O CH<sub>2</sub> CH<sub>2</sub>).

## The Swelling Ratio in Deionized water and Tap water

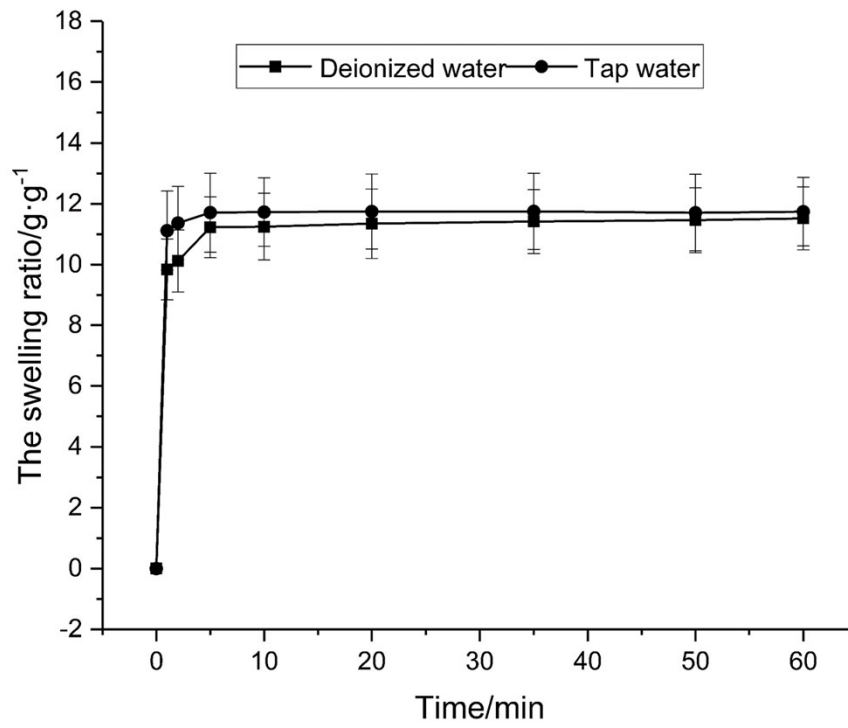

**Fig S2.** The swelling ratio in deionized water and tap water of the CA-PEG-CA powder.

## Clotting Mechanism

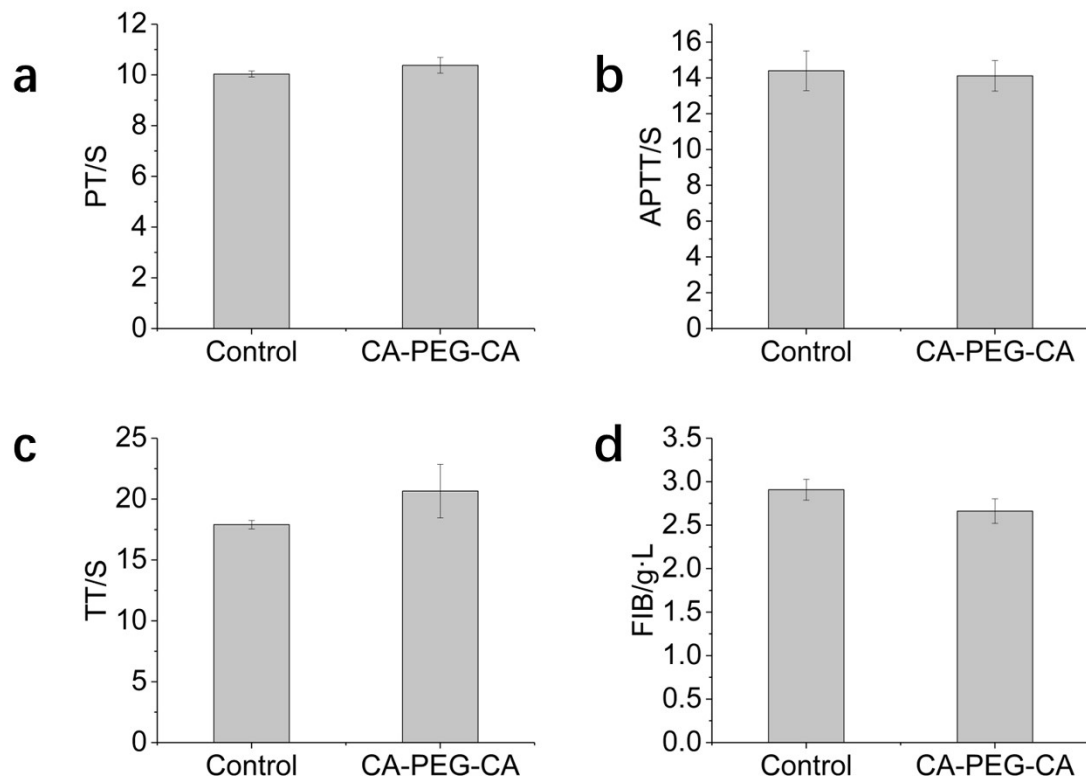

**Fig. S3** The four coagulation items assay of the CA-PEG-CA powder

## Antibacterial Property

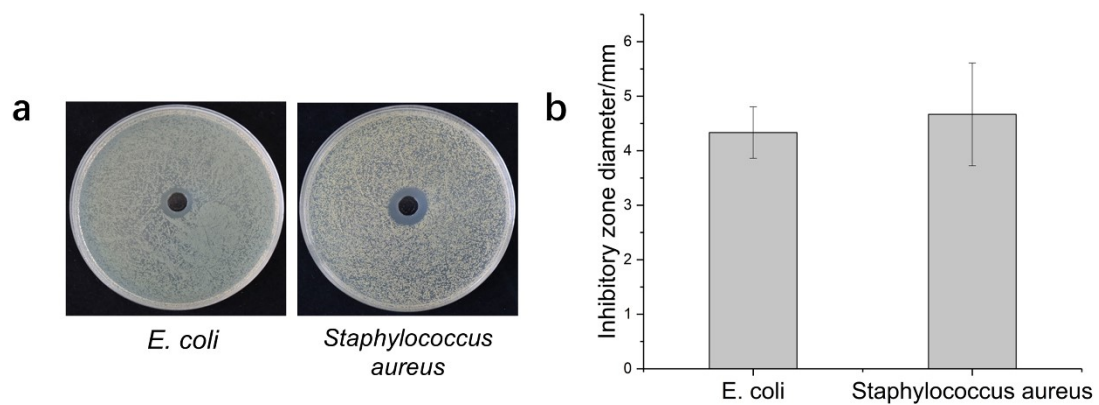

**Fig S4.** Antibacterial property of the CA-PEG-CA. (a, b) Bacteriostatic zone test and the size of bacteriostatic zone diameter of *E. coli* and *S. aureus* co-cultured with the CA-PEG-CA powder.

## Rat liver hemorrhage model

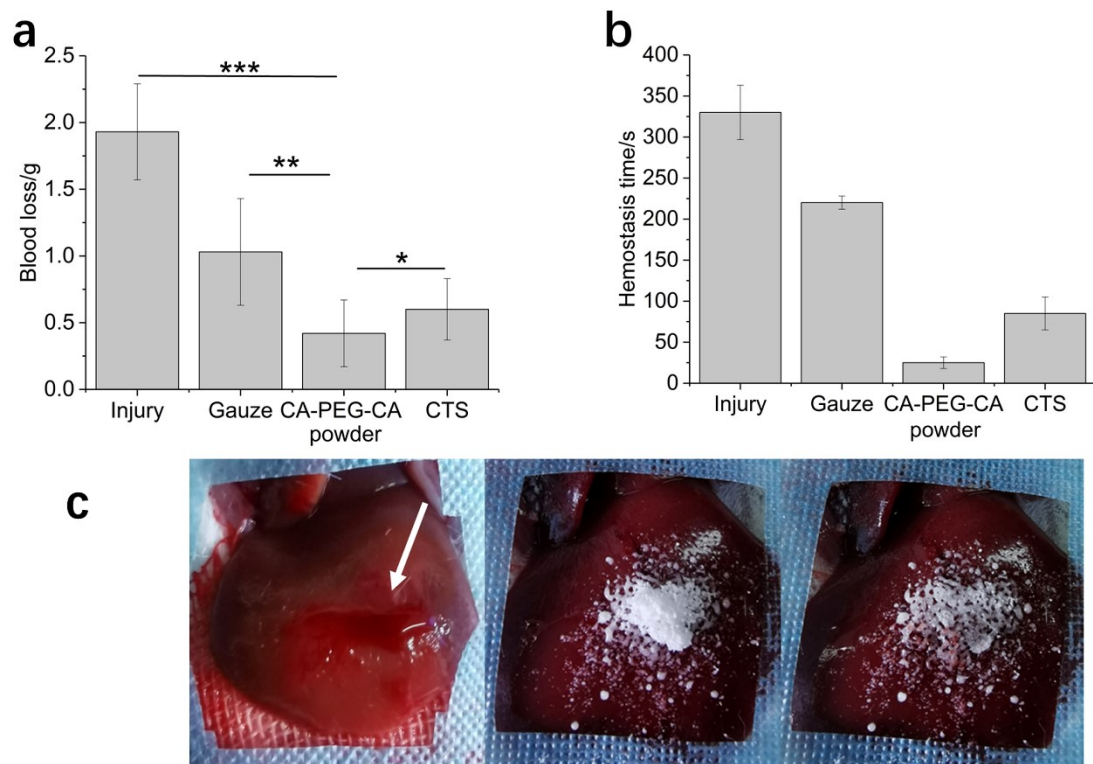

**Fig. S5.** In vivo hemostatic performances in rat liver hemorrhage model. (a, b) The blood loss and hemostasis time of CA-PEG-CA in rat liver injury hemorrhage model, compared with that of the commercialized chitosan. c) The bleeding experiment photos. Error bars represent the s. d. of six independent experiments. \* $p < 0.05$ , \*\* $p < 0.01$ , \*\*\* $p < 0.001$ .

## Rat spleen hemorrhage model

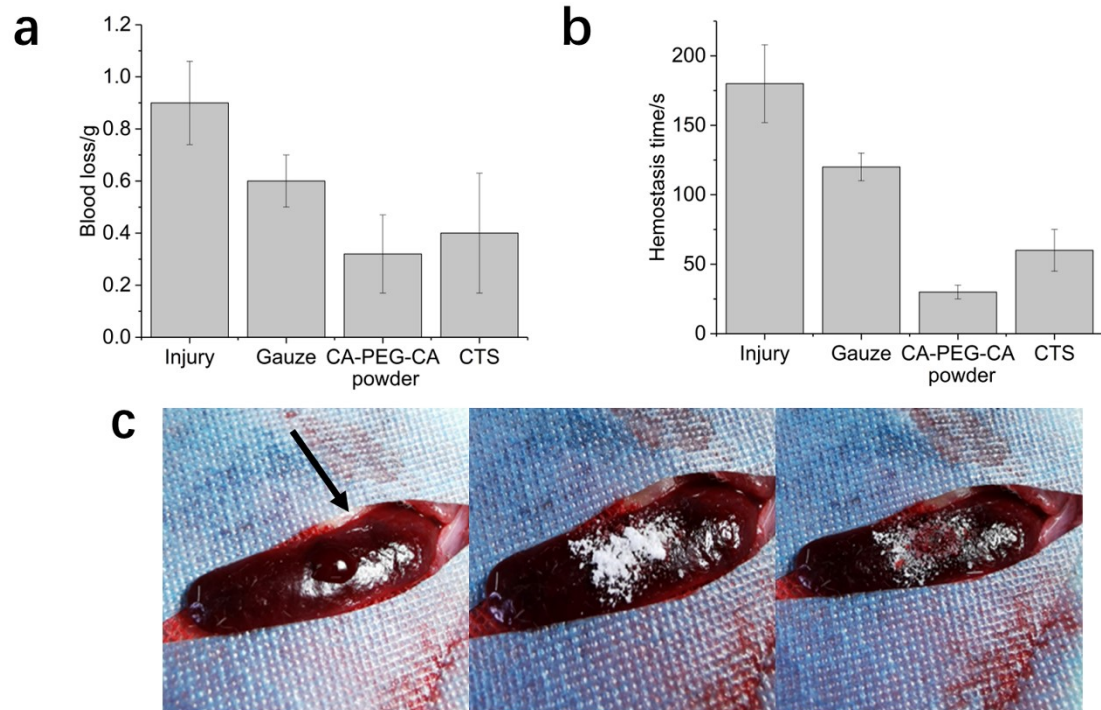

**Fig. S6** In vivo hemostatic performances in rat spleen hemorrhage model. (a, b) The blood loss and hemostasis time of CA-PEG-CA in rat spleen injury hemorrhage model, compared with that of the commercialized chitosan. c) The bleeding experiment photos. Error bars represent the s. d. of six independent experiments. \* $p < 0.05$ , \*\* $p < 0.01$ , \*\*\* $p < 0.001$ .

## Rat kidney hemorrhage model

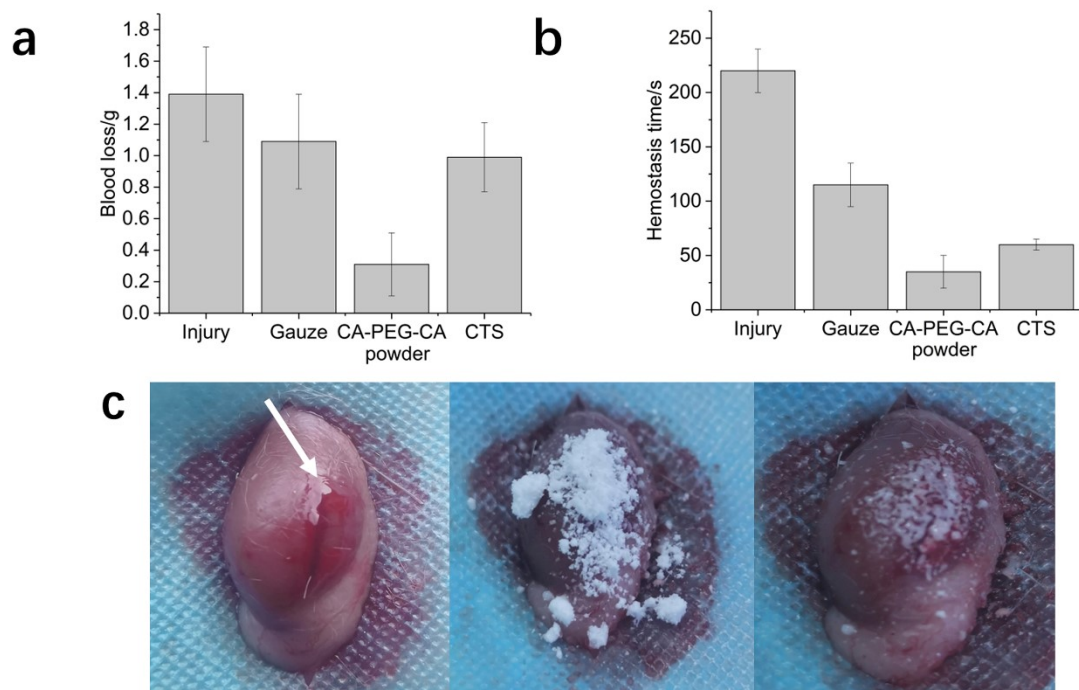

**Fig. S7** In vivo hemostatic performances in rat kidney hemorrhage model. (a, b) The blood loss and hemostasis time of CA-PEG-CA in rat kidney hemorrhage model, compared with that of the commercialized chitosan. c) The bleeding experiment photos. Error bars represent the s. d. of six independent experiments. \* $p < 0.05$ , \*\* $p < 0.01$ , \*\*\* $p < 0.001$ .



## Degradation Experiments

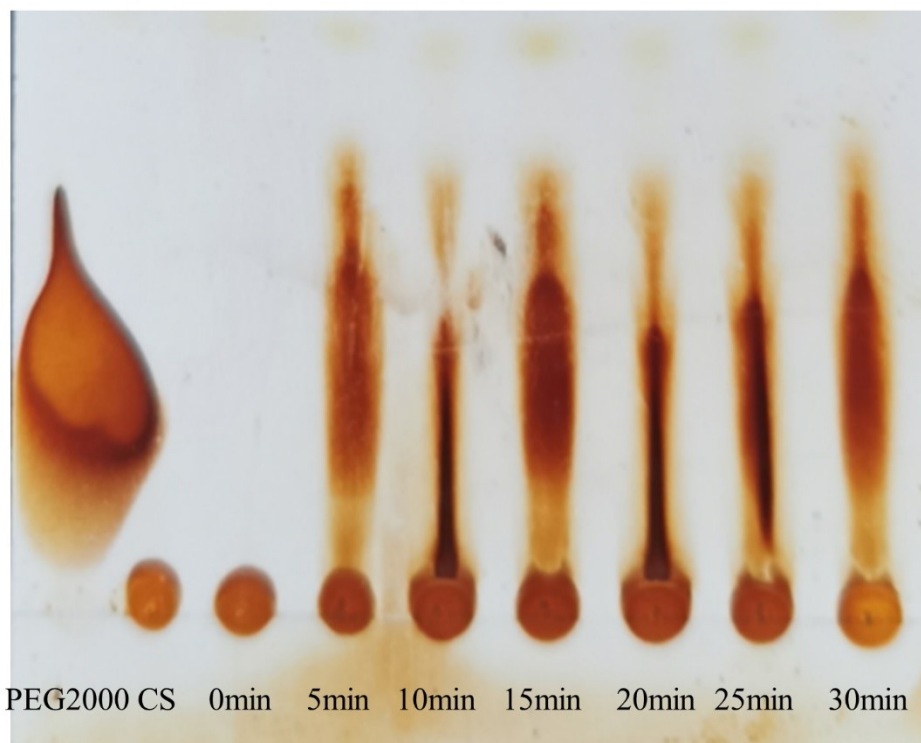

**Fig. S8** Thin layer chromatography of PEG2000 with degradation time

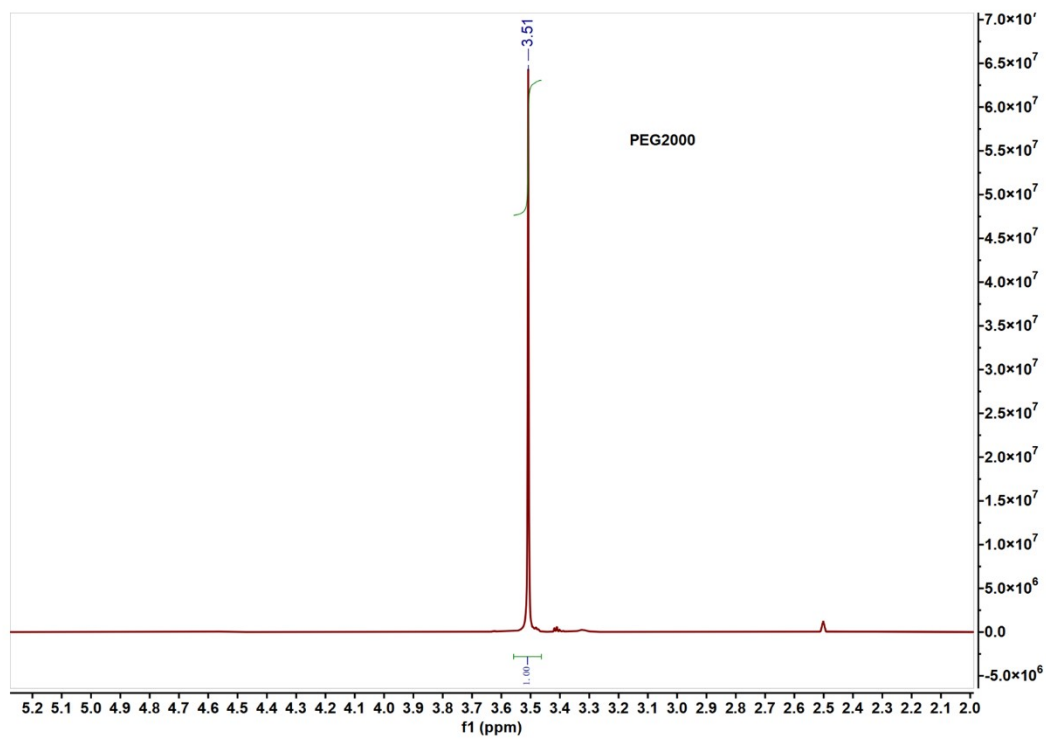

**Fig. S9**  $^1\text{H}$  NMR spectra of the degradation product catalyzed by CS in  $\text{CDCl}_3$ .

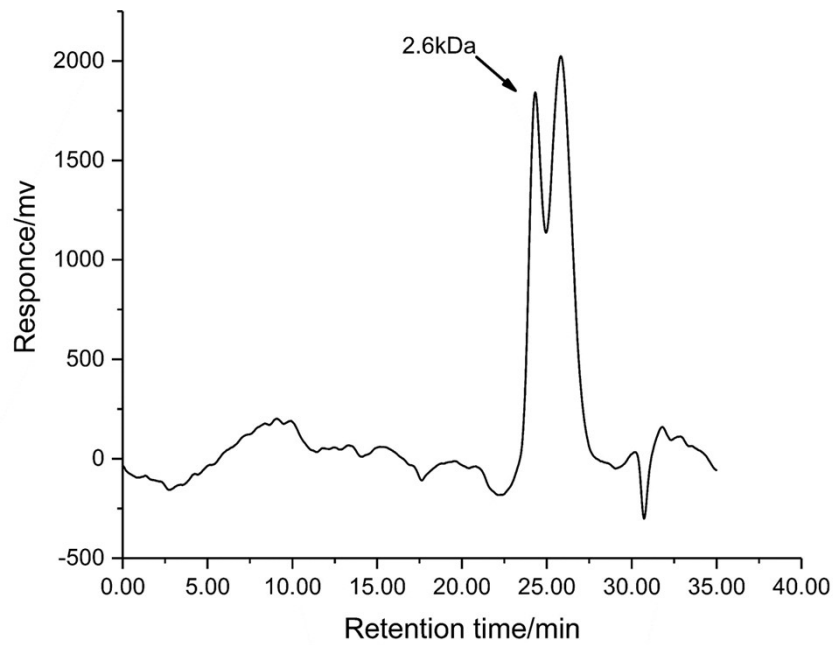

**Fig. S10** Aqueous Gel Permeation Chromatography of the degradation product catalyzed by CS

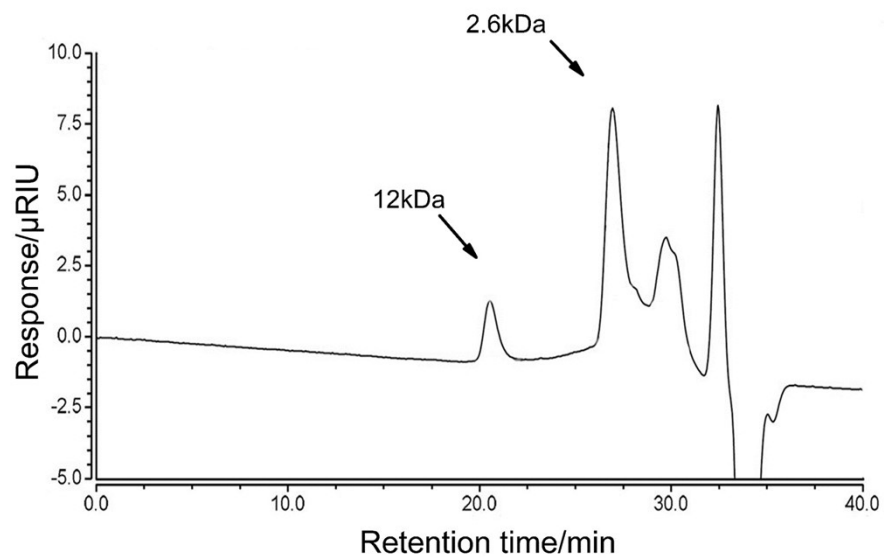

**Fig. S11** Organic Gel Permeation Chromatography of the degradation product catalyzed by CS
